# Supplementary material for: Molecular and Phylogenetic Characterization of Carbapenemase-Producing Gram- Negative Bacteria from VAP Patients: With Structural Insights into OXA-48
Source: Research Square preprint supplement (doi:10.21203/rs.3.rs-6973343/v1), 2025-07-23

**Figure S1. Agarose gel electrophoresis for detection of *bla*OXA-48 gene (438 bp)**

Agarose gel electrophoresis image showing the PCR amplification products of the *bla*OXA-48 Carbapenemase gene. **Lane L:** 100 bp DNA ladder (molecular weight marker); **Lanes 1–13:** DNA samples from clinical isolates tested for *bla*OXA-48. Bands observed at approximately 438 bp indicate **positive amplification** of the OXA-48 gene, while absence of bands denotes **PCR-negative** isolates. PCR primers and cycling conditions are provided in the Materials and Methods section.

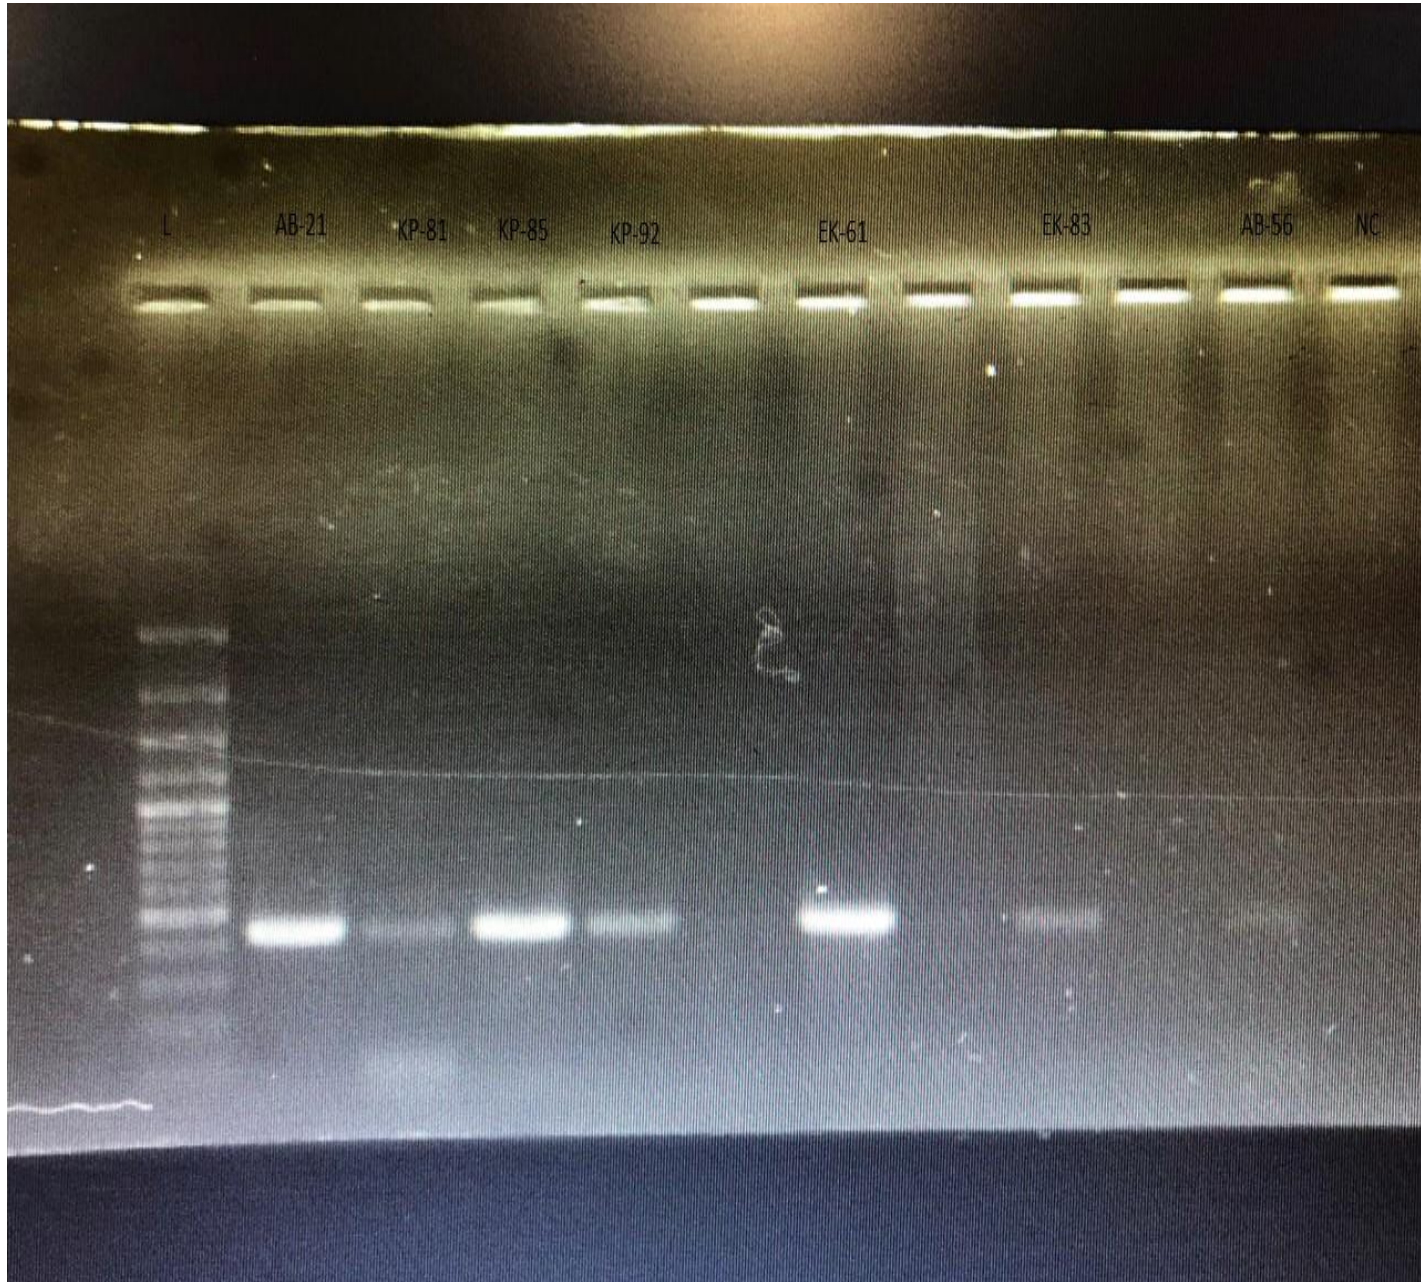

Supplement: Supplementary file 1 [file b068b40fbd416b25e26c03a3.pdf]
